# Supplementary material for: Divergent Evolution of Eukaryotic CC- and A-Adding Enzymes
Source: PubMed Central journal article supplement (PMC7014341; doi:10.3390/ijms21020462), 2020-01-10
Supplement: ijms-21-00462-s001.pdf [file ijms-21-00462-s001.pdf]

## Supplementary Data

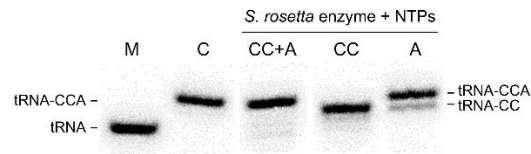

**Figure S1:** *S. rosetta* CC- and A-adding enzymes collaborate in CCA-addition. Equimolar amounts of *S. rosetta* CC- and A-enzyme were pooled and incubated with tRNA<sup>Phe</sup> without CCA-end in the presence of NTPs. As a control, both enzymes were also incubated separately. The A-adding enzyme was incubated with tRNA<sup>Phe</sup> carrying a CC-end, the CC-adding enzyme and the pooled enzymes were incubated with a tRNA<sup>Phe</sup> without CCA-end. The complete CCA-sequence is only added when both enzymes are present. M, mock incubation of tRNA<sup>Phe</sup> without enzymes. C, control lane with tRNA<sup>Phe</sup> with CCA-end as size standard.

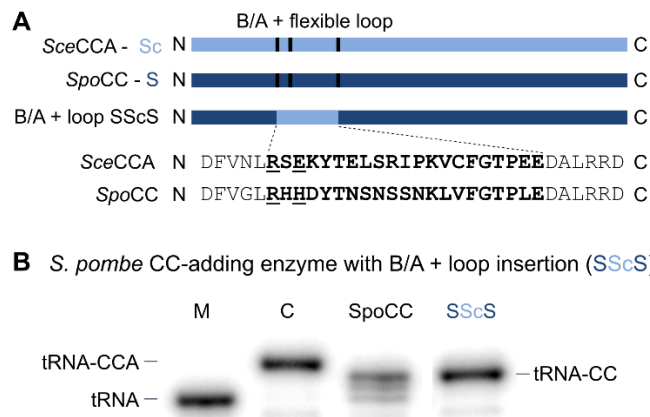

**Figure S2:** The flexible loop of the *S. cerevisiae* CCA-adding enzyme is not compatible with the *S. pombe* CC-adding enzyme. (A) In the CC-adding enzyme (SpoCC), both the flexible loop and the upstream located B/A motif deviate from the consensus sequence of eukaryotic e-type CCA-adding enzymes. For construction of enzyme chimeras, the B/A motif and the loop sequence from the CCA-adding enzyme of *S. cerevisiae* (Sc) were inserted into the CC-adding enzyme of *S. pombe* (S), generating chimera SScS\_B/A + loop (S, *S. pombe* CC-adding enzyme N-terminus; Sc, B/A motif and loop of *S. cerevisiae* CCA-adding enzyme; S, *S. pombe* CC-adding enzyme C-terminus). (B) Insertion of B/A motif and loop of *S. cerevisiae* CCA-adding enzyme does not result in a restoration of A-adding activity. Obviously, this region is not compatible with the context of the *S. pombe* CC-adding enzyme due to their distant evolutionary relation. M, mock incubation of the tRNA in the absence of enzymes; C, control tRNA<sup>Phe</sup> with CCA end as size marker.

**Protein Sequences of CC- and A-adding Enzymes of *Salpingoeca rosetta*, *Schizosaccharomyces pombe***

>euhChoSalros\_aNtr *Salpingoeca rosetta* EGD81016  
MLLGRVACA AVLGGVSGGGCCARSVSCCCCWSVGAATRGRPWRRPV LQLTRRN LQPTMPTSQEVKQKILGTPAV  
QQLKHIFQEDHHEFRLVGGAVRDILLERWPKDYDFATTALPQQTQQLLESRGVRVVL TGLQHGTVTAVIDNVPYE  
VTTLRLDHEGAEGTGPVCFD TDDWKLDAERRDLTINAMSMDLDGHI FDYFDGRDHLAQEKIVFVGDPAQRIQEDFR  
ILRYFRFHGKVCRRHNNHEPAQIQAITDNVQGLSVSGERIWMEMSKILKTARAPELVECMQACGVLPHIQLANVE  
QHHLQRLRHVHRYELEPATALVDDVQQFEGVAAAWRLSNAERKLG LFI IQHRDVDVCMNSAQDLLVDGINRT  
YVTQLCRYQGHLDI AVAMQDWAVPEFPITGKKLIQHGLKPGPNMGRVLAALKDNWKQSRFQLGEEELLAQMDSVV  
ASLS

>euhChoSalros\_eNtr *Salpingoeca rosetta* EGD77004  
MSARAHAVIEQAAATGRIRLTDLEHRV FALLIDVVRQFHLKDTLRVAGGWVRDKLLGRESLDIDITD TDSLGSDDL  
ALHIEQLLKEKNEKDAARFKILPVPEQSAHLQVSTIKLYDLEIDLNALRTEVYDPE SRIPKVSPGTILEDTARRD  
FTINALYYNINQDAIEDFTDTGLSDLDLGLV RTPADPLRSFKEDPLRVLR AIRTGRYGFKLEDAARHAILDPQV  
KECLQTKVSRERYGIEVDKMFKADHPLACL SLLCNLGLYDVVFHSPA EYHRDPTMQMVPFPYFPVPLRMIEPRLV  
MEASLEIANRANKSIVAKAQDGDHHA VQTVLLSAFFSPLWGYICSQDKKVTHRSIVYHMLRRGICLSKASAEMIC  
HMLFSAQQFAEVS RQVLKLYVEKHEEATA PLPDDQQQTQQQQQQQTQQQQQQQGDVDLGDLPADVRLAIGKAMVT  
AGEHWRDAIILCDV FARHFHAFVIERYLPSALLMPWIEKSGLVGCW TWRPLLSGRDVMTILDIKGPMVGR LVRQRI  
SDEMLLQPRMTREECEQWLR  
DNVQALMAECDVDKK

>eufAscSchpom\_eNtr1 *Schizosaccharomyces pombe* NP\_588119.1  
MYSRIVLNDVEKKV VNNLLKKTADFI ESKSSSSSSSLEVRLAGGWVRDKLLGLSSDDL DVTLNKVTVDFANSIFEY  
VHSLDSDSVIPYKDALGKLT VNPDQSKHLETATLSLFDLDIDFVGLRAESYDDKSRI PSVTPGTVETDALRRDFT  
VNTLFFNIRTEKIEDITKRGYKDLQTKVLVTPISPLQSFLEDPLRILRGIRFASRF EFTIDPSVVS AIQDPKVCK  
AFEKKVSKERVGEEIEKMLKGANAKLALQLLYSTNTYQFTFDTLPAEKEFQIPKALEATESL FQSLALTFPKLMK  
LSEDEKIGLWLYVALIPWSSQTV MVKKKQFYI PAIIAKDKLKL RSTYVNQLNQCCTFNPIFDELVNDTSTKNCSS  
IGSLIRQLNKSWEVVFLTSVIYSCCKTPAASVSNTFSSYKSLYDFIYDKNLQ NAYNMKPLLDGKQIMKNVGVKPG  
PQLKETMDNMI SWQFKHPEGSVEDCVAYLQSLKI

>eufAscSchpom\_eNtr2 *Schizosaccharomyces pombe* NP\_594651.2  
MASSSSILELNETEKELSDIFLNVSKKIGQMDRKEPEVRFAGGWVRDKLLRIESH DIDVAIDCM SGFEFAQHLQS  
YLAQQHPDWETKVIKIDANPLKSKHLETATARIMGM DIDI VNLRHHDYTNSSNSNKL VFGTPLEDALRRDATINA  
LFYNLKSKTVEDFTGKGLVDLSNKIIRTPLVADETFGDDPLRAVRCIRFATKYDFNIHEETIKGLKNPELHERLR  
SSISRERIGVEVDKMLKHCNTNRALKI IHS LGMFACIFGPLEIHTKKLQSKNIESLSLIPY AIDLFGYLQKKDVS  
IKNLSSSSKYIFWLAIATL PWINWSILEKSKIKILPPI LIRD SLKYSKPIMSQVENFFVHYPLIMSKINVLEKEG  
KLTRLGCGRLVRELGP HWRDIIDWAFFMNTLISNSDIQR LNKDEEVTWFHV LVKHIEEYGMEEAYNIQPIINGNE  
ITRILGIRPGPHLRKMLDDSI EWRIQNPESTKEDYIAIMLEKGTSAVVDS

## Protein Sequences of newly identified tRNA Nucleotidyltransferases

### Choanoflagellata:

```
> euhChoMonbre_a-type Monosiga brevicollis
built(XP_001750467.1/NW_001865078.1:179129-181381)
MASEAIKQQIIISNPGLCQLGQLFQAAHHDRLRAGGAVRDLLRGLSPKDLDLATTATPEESKAILLAHVVRVETGLQHGTVTA
VIDGEPFEITTLRIDEQTDGRRAMVVYTDWHLDAQRRDLTINAMFMDLHGEIHDYFNGAQDLEAHRIRFVGDADERIKEDYL
RIMRYFRFHGRIALNNEHEAAQLSAIRANAAGLEQISGERVWMELEAKILETTRAPDLLRTMQDCQVLNHI GMTQVTEAHLQEL
QRVHRVCRHAPTLLATLLD TAADLNALFARWRFLAEKRHAQFILDHRASDLTLEAAEDLLVDNTPVAHVEGLCLYQEHVDWA
RHVVAFSIPSPFINGQMLMEVGVKGRVMGRVIQALRISWKAARFTKSADQLLEEVPAILAEAQ
```

```
> euhCorCorlim_a-type Corallochytrium limacisporum Betat_2015_aCCA
MDHEDKPFGRMPDNFAFXNLLNTQIPQLRTLADVISDEGFQLRIVGGAVRDALMGKTPKDI DLGTDGTPEEILKVLETNDYR
VIPTGLQHGTVTAVAGGVNYEITSLRIDRACDGRHAVVDFTRNWRIDAERRDLTVNAMSC TLEGDLYDYFNGYEDLKNRRCLF
VGNAEKRIREDYLRILRYFRFHARIVDPDPTLPGSHQDEATLKLALRENHRGLNRI SGERIWQEMGKILTPAAPAE LRVMYDLEL
MKEIGLDQDTSVHMDHFRCMHARSHDAIACLCSLLNSPEDI EKMKRWKFSNSEERMGMFLVTQRNKDYSLKACKDFLVDKTP
LDFVQWTHIKDAPEADIDILKQWPIPTFPVNGGTLKKGAKPGPSMGEMLADLKQEWKSDSDF SMDQAAL EERAKERISAQQE
S
```

```
> euhIchAbewhi_a-type Abeoforma whisleri Betat_2015_aCCA
ILFFLLFWMPHSFYFKKALVSKRSILRTTTTTNILLQTLQRTPNKHLRLISNNNNSYHTNPTDFASIRMLKQKPIQHFHR
PSSFASNYNLSTRTPLLLKKNTPVFNTAFCQRSLATMTPNTDKIRLQGHQLDRLNEIITPELKRIEE IFKQHNFDIRLVGGVV
RDIYLNQYPKDIDLATNANPHQMIEMLNKEGIRLIETGLQHGTITAVISKQSFEITSLR IDEETDGRHAVVQYTTNWKLDAER
RDLTINAMNLDLDGYLQDYFNQRQHLQRQIFFVVGAPGPIREDYLRILRFFRFHGRIS ESDCYDPDLVAIEENRSGLTRIS
GERIWTEISKI IAGNRNVNIFKTYL CGVCESIHLDPHNRLDTLEYVSTFTLEPISLLVSLHLDLSEFENICLTWKLANT EKN
LGVFLNHRQEFHDLSSQQESNNQVIFKYATDMLVDGVAINFLELLSHGQHSIVEQLKQYNLPRFPINGKDILSQGVKPKG
AVGIAMKLLKTLWKESNYQLTAEELFNHL
```

```
> euhIchAmpar_a-type Amoebidium parasiticum Betat_2015_aCCA
VHEFKQSCLESGLIQCIVLSSHYRAHSYACHGACLPALMRIQTLLARVPSSLQGGIRLYFSRCHFVGS IARSQFTLKPYEIQ
YFKGSTVCNTTALFTRPLSSARHLRPLSTHTATTMGEDGVKVDLPLLGHVLTPEVKALGQLFRENGYHIRLVGGVVRD LLMGK
MPKDTDLATDAHPDQVQAMLEKANIRCVPTGLQHGTVTAVLNKNTYEITTLRIDAETDGRHAEVEFTQDWK LDAERRDLTINA
MSLDFDGHFLFDYFNGREHLENRLVLFVGNADRIKEDYLRILRYFRFHGRISDHQTHDPDVIKALRDNAAGLRRI SGERVWME
MSKILAGNNA PLLALMYDIGVAEEIGLPLSGRQSIPLMEDVRKHSRDPITVLSALLESVLGFEELFAKWKFSGQERNLGLYI
IGNRSWEMTLKFCTDELVEGVEKAKVMELARYKGHPEIADQIKDWVPVPRFPVTGKHKMDKGIKPGPHMGELLRGLKQWQKASN
YTLTAEDLVATLQA
```

### Schizosaccharomycetes:

```
> eufAscProino_CCA Protomyces inouyei built(genome_search,prosplign)
SLTLAADEAKLTHLLQEHAHQRAFSDPAVEIRYAGGWVRDKLVQKPSHDIDIAVSSLSGHAFQAQFAAFLAKAHPDLTTGTIA
KIQANPEKSKHLDTATARFLGLELDFVQLRTESYAESGDTRTPSITGVGTLLEDAERRDCTMNALYYNVHSEKVEDPTGRGLT
DLKRLIQTPLPPRQTFLLDDPLRVLRVLCVRFASQGFEEIEEGTLACLAEGEVRDALDRKVVRRERIGLEVYKMLRGIDPARALKT
LQSSGLYEVVFAPLPSDVSTANFEALERAMRICREEPALMQHYDAYLDGRLWLAIALLPYRDVRMPKDKRGYQDPLACGIIRD
RLKLTNALELLCRQLFPVSDTASVTADASRLELQGLVLRKLRDWRVLLVETLASQEARS IADLKKLLERIKQEGLEDAHTFK
TPVDGKKIRALLLAQDIKLM SVLT
```

```
> eufAscTapdef_CCA Taphrina deformans built(genome_search,prosplign)
MKRSASGSPITLSASMTTKSPQIILEPAAEQLTNLLREASSTAAFSDREVIVRYAGGWVRDKILRKKSHDIDIAISSISGHQF
AVEFAAFLASQHPDLKTGTITKILANPEKSKHLDTATSRLNLDLDFVQLRTESYGPSDSRTSPSVVDVGTLEEDAERRDCTMN
ALYNIHTLQVEDPTSHGLDDLGLIQTPLPPEKTFLLDDPLRVLR CIRFASQFDFTIEPDTFAGMATREVRDALCKKVVKER
VGIEVYKMMKGINPAKAI RALHSQQLYQIVFQDAQDDAFPFDFTVVERAIDVLSKSAGLRRHLSEYSTDGRLWFVIVAILPY
CRKLCVPVKKKDV EPLGCLMVRDHLKLTSLLEALVRATFPFRQVPVTNESSPLELKGKRVLLRDKDWKLAVFVFADEPGPR
DVDSLVALFDRIADLGLDRAWSFASFIDGKKIRP LLEKHETNIKVMKELVELVIEYRIEDPAVTEEEAMTKLRAHLETRPVGP
EG
```

```
> eufAscTapfla_CCA Taphrina flavorubra built(genome_search,ncbi_genomes)
IILESAERQLTDLLEAASTSAFSDPQVVVRYAGGWVRDKILRKKSHDIDIAISSISGHQFAVEFAAFLTSQHPDLKTGTITK
ILANPEKSKHLDTATSRLNLDLDFVQLRTESYGSADSRTSPSVVGVGTLEEDAERRDCTMNALYYNVHSEKVEDPTGRGLDDL
ACGLIQTPLPPTKTFLLDDPLRVLR CIRFASQFD FDI EADTLAGMATPEVRAALGCKVVKERVGIEVYKMMKGINPAKAI RTLY
DRGLYHIVFQDARPDVISPWFSDIVERAIDVLRNAALRAHLNEYETDDDGRLWFIVSLLPYCQRPVFNKKAKGLEEPL
ACVTVRDHLKLTGLLELLVRATFPFRPVTVSLDSSPLELGRFVRS LKKDWKLALFVSVFAAADQEGDGDVSRNAAGVVDGEGE
VALMDRIATLKLDRAWSFTSFIDGGKIRPLLQEHGTHIKVMKEL
```

> eufAscTappop\_CCA *Taphrino populina* built(genome\_search,prosplign)  
MKRSCSGSPIMSTPEHPTSSTKPYIGLTDEESQLTLLREACSKAAFSDFNVVVRVYAGGWVRDKILQKQSHDIDIVVSSLGSH  
TFAVEFAAYLASQHPDLKQGTVSKILANPEKSKHLDATSKFSLDLDFVQLRTEEYGSLSRTPDVVGVGTLQQAERDCT  
MNALYYNIHDMAVEDPTEQGLYDLQQGLLKTPLAPKKTFLDDPLRMLRCIRFTSQFGFNIDEATFAEMKELDVRRALKEKVVK  
ERVGIEVWMMKGVDPERAIRALYSQGLYHTVFMDELPDAVVPWFDFSI VEHAFKILKESNALKAHLIDYTDGRLCLIIAMLP  
YRFEMAIEVPPKPGVLEPLGCVMI RNTLKL TGALET LVRVFPFPPREVTLNKDSSALELGKMVRVLKDKWLALFVSHLSPES TM  
TIEELIELMDQITALGLDTAWSFMPFIDGKKIRPLLQESKAHIK

> eufAscTapwie\_CCA *Taphrina wiesneri* built(genome\_search,prosplign)  
MKRSASGSPITFTSMTTKSPQIILDPAEQQLTSLREAASTSAFSDSQVVRVYAGGWVRDKILHKKSHDIDIAISSISGHQF  
AVEFAAFLTSQHPDLKTGTITKILANPEKSKHLDATSRFLNLDLDFVQLRTEESYGSADSRTPSVVDVGTLEEDAERDCTMN  
ALYNYNIHTLQVEDPTRHGLDDLGLIQTPLPPEKTFLLDPLRVLRCIRFASQFDFSIQPDTFAGMATKEVREALKCKVVKER  
VGIEVYKMMKGINPPKAI RALHSQQLYQIVFQDAQPEEEFPWFDFAI VERA INVLSTSSRLRDHLSEY TADGRLWFIVAILPY  
CRQLRFPVPPKKDVEEPLGCVMVRDFLKL TSLLEALVRATFPFPPREVSVSINSTPLELGK FVRLKDKWLALFVSFVADSTHAV  
DVDGLVALMDRITECGLDRAWSFTSFIDGKKIKPLLEE HGH THIKVMKELVELVIEYRIEDPDITEEQAMAKLREYLKTRPIAQ

> eufAscNeoirr\_CCA *Neolecta irregularis* built(genome\_search,prosplign)  
SLSFKMTCCPEIVLTPKEERLRKALVATADHIKIKEGKDVTVRLAGGWVRDKLLSIQCNDLDVTLDSQTGYQFALKMKNYLDT  
TGSSDLTSITKIESNPAKSKHLETATRFLDLDLDFVNL RSE EYTTTSRIPEMKFGTPKEDASRRDCTINSMFYNVHTRKVED  
YXXXXXXXXXXXXXXXXXXXXXXXXXSLVKALKLKISRERVGEEVNKMLKGPDEYALRMICEYGLYDSVFSTWQTSIDPTLASSA  
AKIVKWILESKPLSSQLDSVSQRRLFLVAAVLPWLHQPSPDQKHIAAVVSVRDALKLPTIDSDFIKHCFMHMQDVHKAASRN  
YSSENGLSRLETGLLIRVLGKNWPLIVNSSFIYDLAHTDSSLET LKPLINGKLANLLHLQPGPEIKNALDNLLQWQLENPD  
GTATEYENLST

## Loop sequences for e-type nucleotidyltransferase Weblogo generation

>Q94K06\_Arabidopsis\_thaliana  
DFVNLRS~~E~~EYTENSRIPTMKFGTAKDDAFRRD

>C1E3J8\_Micromonas\_sp  
DLVNLRS~~E~~EYTEASRIPEMKFGSATDDAYRRD

>A8J6P4\_Chlamydomonas\_reinhardtii  
DLVNLRS~~E~~TYAADSRIPTMTFGTPQQDALRRD

>Q42867\_Lupinus\_albus  
DFVNLRS~~E~~EYTDNSRIPSMQRFGTPEEDAYRRD

>Q2QX33\_Oryza\_sativa\_subsp\_japonica  
DFVNLRS~~E~~KEYAENSRIPTVEIGTAKEDAFRRD

>A4RUG6\_Ostreococcus\_lucimarinus  
DLVNLRS~~E~~NYSEDSRIPEMQFGTAKDDAFRRD

>Q01CL7\_Ostreococcus\_tauri  
DLVNLRS~~E~~NYSEDSRIPDMEFGTAKDDAFRRD

>A9RJR2\_Physcomitrella\_patens  
DFVNLRA~~E~~TYANNSRIPTMEFGTAEQDAFRRD

>A7QGJ5\_Vitis\_vinifera  
DFVNLRS~~E~~DYSENSRIPTMRFGTAKEDAYRRD

>B9MW94\_Populus\_trichocarpa  
DFVNLRS~~E~~DYSENSRIPTMTFGTAKEDAYRRD

>B9T6L0\_Ricinus\_communis  
DFVNLRC~~E~~DYTEDSRIPTMKFGTAEEDAFRRD

>Q74ZT0\_Ashbya\_gossypii  
DFVNLRS~~E~~TYAEESRVPTVEFGTPLQDAMRRD

>Q9P4S5\_Candida\_glabrata  
DFVNLRS~~E~~EYTEDSRIPTTQFGTPEEDALRRD

>Q6BP89\_Debaryomyces\_hansenii  
DFVNLRS~~E~~EYTTDSRVPIIECGTAEEDALRRD

>Q6CSU9\_Kluyveromyces\_lactis  
DFVNLRS~~E~~EYTMESRIPKVEFGTPYDDAMRRD

>A7TSN1\_Vanderwaltozyma\_polyspora  
DFVNLRS~~E~~EYTENSRIPTVEFGTPEQDALRRD

>A3LSZ1\_Pichia\_stipitis  
DFVNLRS~~E~~EYSDDSRVPIIKFGTPEEDAYRRD

>Q2H0X0\_Chaetomium\_globosum  
DFVNLRR~~E~~TYTESSRNPVVEFGTAEEDALRRD

>A1C7Z8\_Aspergillus\_clavatus  
DLVNLRK~~E~~TYTDESRNPQMEFGTAEEDAMRRD

>A6SEN3\_Botryotinia\_fuckeliana  
DFVNLRK~~E~~TYTEDSRNPEMEFGTAEEDALRRD

>A7ESI2\_Sclerotinia\_sclerotiorum  
DFVNLRKETYTEDSRNPQMEPGTAEEDALRRD

>Q8SS78\_Encephalitozoon\_cuniculi  
DFVNLRNETYSETRIPNVKPGTPEEDAFRRD

>A9CRH2\_Enterocytozoon\_bieneusi  
DFVHLRTESYTTSRIPQITHGTPQEDAYRRD

>Q55XT2\_Cryptococcus\_neoformans  
DFVGLRSEYADSRIPOVKPGTPEEDASRRD

>A8Q3K4\_Malassezia\_globosa  
DFVNLRKEVYEGTHRIPVMSFGTPLDDAMRRD

>P21269\_Saccharomyces\_cerevisiae  
DFVNLRSEKYTELSRIPKVCFGTPEEDALRRD

>Q6CAF4\_Yarrowia\_lipolytica  
DFVNLRSEEYSDESRRVPVVQFGTAEQDAYRRD

>A4RHL3\_Magnaporthe\_grisea  
DFVNLRKETYTEDSRNPQMEFGTAEEDALRRD

>Q7SAL9\_Neurospora\_crassa  
DLVNLRKETYTEDSRHPQVEFGTAEEDALRRD

>A1DIN0\_Neosartorya\_fischeri  
DLVNLRKETYTDDSRNPQMEYGTAEEDALRRD

>Q4WZK0\_Aspergillus\_fumigatus  
DLVNLRKEMYTDDSRNPQMEFGTAEEDALRRD

>A2QJY3\_Aspergillus\_niger  
DLVNLRKETYSEDSRNPQMEFGTAQEDAMRRD

>Q2UB09\_Aspergillus\_oryzae  
DLVNLRKETYSDSRNPQMEFGTAEEDAMRRD

>Q0CVM0\_Aspergillus\_terreus  
DLVNLRKETYTDDSRNPQMEFGTAEEDAMRRD

>Q1DJQ5\_Coccidioides\_immitis  
DLVNLRKETYSDHSRHPEMEFGTAEEDALRRD

>Q5AWL8\_Emericella\_nidulans  
DLVNLRKEAYDENSRTPOMEFGTAEEDALRRD

>A6R867\_Ajellomyces\_capsulata  
DLVNLRKETYSDSRNPQVEIGTPEEDALRRD

>Q0UH04\_Phaeosphaeria\_nodorum  
DLVNLRKETYNEVSRNPQMEFGTAEEDAMRRD

>C4V7M3\_Nosema\_ceranae  
DFVNLRCEKYTDTRIPLITIGTAQEDAFRRD

>B0CQW9\_Laccaria\_bicolor  
DLVNLRSEEYSETSRIPTEVLFGTPLEDARRRD

>Q4P7C9\_Ustilago\_maydis  
DFVNLRKETYDPGSRIPTMTFGTPKEDAERRD

>A7AWW8\_Babesia\_bovis  
DFVNLRS<sup>ED</sup>YAQNSRIPIMKIGTPFEDAMRRD

>Q5CPD4\_Cryptosporidium\_hominis  
DFVGLRSE<sup>TY</sup>TLESRIPIITLGTAEEDAFRRD

>Q5CUP1\_Cryptosporidium\_parvum  
DFVGLRSE<sup>TY</sup>TLESRIPIITLGTAEEDAFRRD

>Q4YRW2\_Plasmodium\_berghei  
DIVNLRNEKYTEESRIPEISIGTVEEDALRRD

>Q4UBS4\_Theileria\_annulata  
DFVNLRTEDYSSNTRIPDMKIGTPVEDAMRRD

>A0BX57\_Paramecium\_tetraurelia  
DFVNLRG<sup>ET</sup>YTQNSRTPQIVVGTPEQDAFRRD

>A8BT44\_Giardia\_lamblia  
DLVNLRAESYQ<sup>ET</sup>SRVPSAIKFGSPHEDALRRD

>Q4Y283\_Plasmodium\_chabaudi  
DIVNLRNETYTEESRIPEIAIGTPEEDALRRD

>Q8IIG2\_Plasmodium\_falciparum  
DIVNLRNEKYTEESRIPEIVIGTPEEDALRRD

>Q7PDU7\_\_Plasmodium\_yoelii\_yoelii  
DIVNLRNEKYTEESRIPEISIGTVEEDALRRD

>A5K4L8\_Plasmodium\_vivax  
D<sup>V</sup>VNLRNEKYTEDSRIPEIIIGTPEEDALRRD

>Q4MZK9\_Theileria\_parva  
DFVNLRTEDYSSNTRIPDMKIGTPLEDAMRRD

## Loop sequences for a-type nucleotidyltransferase Weblogo generation

>euhIchSphdes [Sphaerothecum\_destruens\_NA]  
EITTLRVDS EHDGRWAQCSWTRDWREDALRRD

>euhFilMinvib [Ministeria\_vibrans\_NA]  
EVTTLRVDTATDGRFAEVKYTSSWREDAERRD

>euhCorCorlim [Corallochytrium\_limacisporum\_NA]  
EITSLRIDRACDGRHAVVDFTRNWRIDAERRD

>euhIchCrefra [Creolimax\_fragrantissima\_NA]  
EITTLRIDTITDGRHAEVDFTTSWVEDAARRD

>euhMetDromel [AAF51964\_Drosophila\_melanogaster]  
EVTTLRIDIRTDGRHAEVMYTTDWQLDANRRD

>euhIchAbewhi [Abeoforma\_whisleri\_NA]  
EITSLRIDEETDGRHAVVQYTTNWKLD AERRD

>euhIchPirgem [Pirum\_gemmata\_NA]  
EVTSLRIDKETDGRHAVVEWRKDAERRD

>euhMetHomsap [BAB70662\_Homo\_sapiens]  
EITTLRIDVTTDGRHAEVEFTTDWQKDAERRD

>euhMetStrpur [XP\_784774\_Strongylocentrotus\_purpuratus]  
EITTLRIDRVTDGRHAEVEFTTDWRTDAERRD

>euhChoMonbre [EDQ84681\_Monosiga\_brevicollis]  
EITTLRIDEQTDGRRAMVVYTDWHLDAQRRD

>euhMetAmpque [XP\_003390969\_Amphimedon\_queenslandica]  
EITTLRIDHVTDGRHALVQFTSDWVKDAERRD

>euhMetNemvec [XP\_001637889\_Nematostella\_vectensis]  
EVTTLRIDVETDGRHAKVKFTNDWQLDAERRD

>euhMetTriadh [XP\_002112522\_Trichoplax\_adhaerens]  
EITTLRIDAITDGRHAQVQFTNDWRIDAERRD

>euhIchAmopar [Amoebidium\_parasiticum]  
EITTLRIDAETDGRHAEVEFTQDWKLD AERRD

>euhIchIchhof [Ichthyophonus\_hoferi\_NA]  
EITTLRIDEVTDGRHAEVVFTQDWKLD AERRD

>euhFilCapowc [EFW46942\_Capsaspora\_owczarzaki]  
EVTTLRVDKITDGRHAEVEFTSDWSLDAQRRD

>AniLupus[533758\_anis\_lupus\_familiaris\_(dog)]  
EITTLRIDVVT DGRHAEVEFTTDWQKDAERRD

>IxoScap[B7Q4B3\_Ixodes\_scapularis]  
EVTTLRIDVVT DGRHAEVEFTTDWETDANRRD

>BOVIN [Q1RML6\_BOVIN]  
EITTLRIDVATDGRHAEVEFTTDWQKDAERRD

>RatNor [Q4VBH2\_RAT]  
EVTTLRIDVSTDGRHAEVEFTTDWQKDAERRD



>MacMula[XP\_001100673\_1\_Macaca\_mulatta]  
EITTLRIDVTTDGRHAEVEFTTDWQKDAERRD

>TaeGutt[XP\_002186976\_Taeniopygia\_guttata]  
EITTLRIDVVTDGRHAEVEFTTDWHKDAERRD

>MonDome[1\_XP\_001374161\_Monodelphis\_domestica]  
EITTLRIDVITDGRHAEVEFTTDWQKDAERRD

>MusMusc[Q8K1J6\_Mus\_musculus]  
EVTTLRIDVTTDGRHAEVEFTTDWQKDAERRD

>OrnAnat[XP\_001506360\_1\_Ornithorhynchus\_anatinus]  
EITTLRIDVMTDGRHAEVEFTTDWEKDAGRDR

>XenTrop[Q6P873\_Xenopus\_tropicalis]  
EITTLRVQTDGRHAEVEFTTDWETDAERRD

>DanReri[Q6IQR7\_Danio\_rerio]  
EVTTLRVQTDGRHAEVEFTTDWQKDAERRD

>TetNigr[Q4SR02\_Tetraodon\_nigroviridis]  
EVTTLRVQTDGRHAEVEFTTDWQKDAERRD

>NemVect[A7RRV1\_Nematostella\_vectensis]  
EVTTLRIDVETDGRHAKVKFTNDWQLDAERRD

>AedAegy[Q17N51\_Aedes\_aegypti]  
EITTLRIDAVTDGRHAEVIHTTDWLLDANRRD

>AnoGambi[Q7QCF2\_Anopheles\_gambiae]  
EITTLRIDAITDGRHAEVIHTTDWLLDANRRD

>CulQuin[B0X1I4\_Culex\_quinquefasciatus]  
EITTLRIDAVTDGRHAEVIHTKDWLLDANRRD

>CaeEleg[Q93795\_Caenorhabditis\_elegans]  
EITTLRVDIVCDGRRAQVEYTTDWQLDANRRD

>TriCast[XP\_969345\_Tribolium\_castaneum]  
EVTTLRIDVVTDGRRAEVQFTTDWLLDALRRD

## Loop sequences of a-type enzymes from arbitrarily chosen Choanoflagellata

>*Hartaetosiga\_balthica*  
EITTLRLDHSINGVAMETQCFTDDWELDALRRD

>*Salpingoeca\_kjevrii*  
EISTLRIDPGNLAAVDEEDSEAPWRADAACRD

>*Microstomoeca\_roanoka*  
EVTTLRLDEHTCEDTSKEKAPQADEQIIIFTENWKLDAERRD

>*Salpingoeca\_punica*  
EITTLRTDENDSAPDRTFLLDAKCRD

>*Salpingoeca\_rosetta*  
EVTTLRLDHEGAEGTGPVCFTDDWKLDAERRD

## Abbreviations used in Figure 2 and 3

| Abbreviation      | Organism                              | Accession number   |
|-------------------|---------------------------------------|--------------------|
| bAquAquaao_A      | <i>Aquifex aeolicus</i>               | NP_213288          |
| bAquAquaao_CC     | <i>Aquifex aeolicus</i>               | NP_214480          |
| bBciBachal_A      | <i>Bacillus halodurans</i>            | NP_243747          |
| bBciBachal_CC     | <i>Bacillus halodurans</i>            | NP_242550          |
| bCyaSyysp_A       | <i>Synechocystis sp.</i>              | NP_441479          |
| bCyaSyysp_CC      | <i>Synechocystis sp.</i>              | NP_442458          |
| bDeiDeirad_A      | <i>Deinococcus radiodurans</i>        | NP_294707          |
| bDeiDeirad_CC     | <i>Deinococcus radiodurans</i>        | NP_294915          |
| bDeiThethe_A      | <i>Thermus thermophilus</i>           | YP_144097          |
| bDeiThethe_CC     | <i>Thermus thermophilus</i>           | YP_144191          |
| bSpiBorbur_CCA    | <i>Borrelia burgdorferi</i>           | ZP_03086907        |
| bTheFernod_CCAIIa | <i>Fervidobacterium nodosum</i>       | A7HLG0             |
| bTheThemar_CCAIIa | <i>Thermotoga maritima</i>            | Q9WZH4             |
| baEhrcha_CCA      | <i>Ehrlichia chaffeensis</i>          | Q2GF83             |
| baRhilot_CCA      | <i>Rhizobium loti</i>                 | Q98HS9             |
| baRicpro_CCA      | <i>Rickettsia prowazekii</i>          | Q9ZEC8             |
| bdGeosul_A        | <i>Geobacter sulfurreducens</i>       | NP_952632          |
| bdGeosul_CC       | <i>Geobacter sulfurreducens</i>       | NP_953233          |
| bgEsccol_CCA      | <i>Escherichia coli</i>               | P06961             |
| bgWigglo_CCA      | <i>Wigglesworthia glossinidia</i>     | Q8D2W4             |
| ebChlAratha_CCA   | <i>Arabidopsis thaliana</i>           | Q94K06             |
| ebChlLupalb_CCA   | <i>Lupinus albus</i>                  | AAB03077.1         |
| ebChlPhypat_CCA   | <i>Physcomitrella patens</i>          | A9RJR2             |
| eufAscAspnid_CCA  | <i>Aspergillus nidulans</i>           | KZN89459           |
| eufAscCangla_CCA  | <i>Candida glabrata</i>               | XP_449283.1        |
| eufAscKlulac_CCA  | <i>Kluyveromyces lactis</i>           | AAG00316           |
| eufAscNeoirr_CCA  | <i>Neolecta irregularis</i>           | NA                 |
| eufAscNeucra_CCA  | <i>Neurospora crassa</i>              | XP_962692          |
| eufAscPnecar_CCA  | <i>Pneumocystis carinii</i>           | XP_018225359.1     |
| eufAscPnejir_CCA  | <i>Pneumocystis jirovecii</i>         | XP_018230996.1     |
| eufAscPnemur_CCA  | <i>Pneumocystis murina</i>            | XP_007874977.1     |
| eufAscProino_CCA  | <i>Protomyces inouyei</i>             | NA                 |
| eufAscProlac_CCA  | <i>Protomyces lactucaedebilis</i>     | ORY85595           |
| eufAscSaccer_CCA  | <i>Sacharomyces cerevisiae</i>        | NP_011095          |
| eufAscSaicom_CCA  | <i>Saitoella complicata</i>           | XP_019025108.1     |
| eufAscSchcry_A    | <i>Schizosaccharomyces cryophilus</i> | EPY50617_Scry/1489 |
| eufAscSchcry_CC   | <i>Schizosaccharomyces cryophilus</i> | EPY50393_Scry/1538 |
| eufAscSchjap_A    | <i>Schizosaccharomyces japonicus</i>  | EEB06657_Sjap/1487 |
| eufAscSchjap_CC   | <i>Schizosaccharomyces japonicus</i>  | EEB07205_Sjap/1526 |
| eufAscSchoct_A    | <i>Schizosaccharomyces octosporus</i> | EPX70971_Soct/1489 |
| eufAscSchoct_CC   | <i>Schizosaccharomyces octosporus</i> | EPX73121_Soct/1536 |
| eufAscSchpom_A    | <i>Schizosaccharomyces pombe</i>      | NP_588119.1        |
| eufAscSchpom_CC   | <i>Schizosaccharomyces pombe</i>      | NP_594651.2        |
| eufAscTapdef_CCA  | <i>Taphrina deformans</i>             | NA                 |

|                     |                                      |                    |
|---------------------|--------------------------------------|--------------------|
| eufAscTapfla_CCA    | <i>Taphrina flavorubra</i>           | NA                 |
| eufAscTappop_CCA    | <i>Taphrino populina</i>             | NA                 |
| eufAscTapwie_CCA    | <i>Taphrina wiesneri</i>             | NA                 |
| euhCorCorlim_a-type | <i>Corallochytrium limacisporum</i>  | NA                 |
| euhFilCapowc_a-type | <i>Capsaspora owczarzaki</i>         | Cowc_CAOG_04900    |
| euhIchAbewhi_a-type | <i>Abeoforma whisleri</i>            | NA                 |
| euhIchAmopar_a-type | <i>Amoebidium parasiticum</i>        | NA                 |
| euhIchCrefra_a-type | <i>Creolimax fragrantissima</i>      | CFRG8205T1         |
| euhMetCaelee_CCA    | <i>Caenorhabditis elegans</i>        | Q93795             |
| euhMetDromel_CCA    | <i>Drosophila melanogaster</i>       | AAF51964           |
| euhMetHomsap_CCA    | <i>Homo sapiens</i>                  | BAB70662           |
| euhMetStrpur_CCA    | <i>Strongylocentrotus purpuratus</i> | XP_787015          |
| euhChoAcaspe_a-type | <i>Acanthoeca spectabilis</i>        | 1cl GGPA01036680.1 |
| euhChoChoper_a-type | <i>Choanoeca perplexa</i>            | 1cl GGOP01021473.1 |
| euhChoCodhol_a-type | <i>Codosiga hollandica</i>           | 1cl GGOV01001436.1 |
| euhChoDiagra_a-type | <i>Diaphanoeca grandis</i>           | 1cl GGPB01030090.1 |
| euhChoDidcos_a-type | <i>Didymoeca costata</i>             | 1cl GGOQ01024127.1 |
| euhChoHarbal_a-type | <i>Hartaetosiga balthica</i>         | 1cl GGOO01006806.1 |
| euhChoHargra_a-type | <i>Hartaetosiga gracilis</i>         | 1cl GGOU01008309.1 |
| euhChoHelnan_a-type | <i>Helgoeca nana</i>                 | 1cl GGOR01029434.1 |
| euhChoMicroa_a-type | <i>Microstomoeca roanoka</i>         | 1cl GGON01002325.1 |
| euhChoMonbre_a-type | <i>Monosiga brevicollis</i>          | NA                 |
| euhChoMylflu_a-type | <i>Mylnosiga fluctuans</i>           | 1cl GGOI01002178.1 |
| euhChoSaldol_a-type | <i>Salpingoeca dolichothecata</i>    | 1cl GGOK01027531.1 |
| euhChoSalhel_a-type | <i>Salpingoeca helianthica</i>       | 1cl GGOJ01023652.1 |
| euhChoSalinf_a-type | <i>Salpingoeca infusionum</i>        | 1cl GGOW01010160.1 |
| euhChoSalkve_a-type | <i>Salpingoeca kvevrii</i>           | 1cl GGOX01015633.1 |
| euhChoSalmac_a-type | <i>Salpingoeca macrocollata</i>      | 1cl GGOT01013341.1 |
| euhChoSalpun_a-type | <i>Salpingoeca punica</i>            | 1cl GGOZ01014644.1 |
| euhChoSalros_a-type | <i>Salpingoeca rosetta</i>           | EGD81016           |
| euhChoSalurc_a-type | <i>Salpingoeca urceolata</i>         | 1cl GGOY01009706.1 |
| euhChoSavpar_a-type | <i>Savillea parva</i>                | 1cl GGOL01014571.1 |
| euhChoStedip_a-type | <i>Stephanoeca diplocostata</i>      | 1cl GGOM01014527.1 |
| euhChoChoper_e-type | <i>Choanoeca perplexa</i>            | 1cl GGOP01015435.1 |
| euhChoHarbal_e-type | <i>Hartaetosiga balthica</i>         | 1cl GGOO01012516.1 |
| euhChoHargra_e-type | <i>Hartaetosiga gracilis</i>         | 1cl GGOU01003296.1 |
| euhChoMicroa_e-type | <i>Microstomoeca roanoka</i>         | 1cl GGON01033848.1 |
| euhChoMonbre_e-type | <i>Monosiga brevicollis</i>          | EDQ88852           |
| euhChoSalinf_e-type | <i>Salpingoeca infusionum</i>        | 1cl GGOW01025095.1 |
| euhChoSalkve_e-type | <i>Salpingoeca kvevrii</i>           | 1cl GGOX01014948.1 |
| euhChoSalmac_e-type | <i>Salpingoeca macrocollata</i>      | 1cl GGOT01008786.1 |
| euhChoSalpun_e-type | <i>Salpingoeca punica</i>            | 1cl GGOZ01000957.1 |
| euhChoSalros_e-type | <i>Salpingoeca rosetta</i>           | EGD77004           |
| euhChoSalurc_e-type | <i>Salpingoeca urceolata</i>         | 1cl GGOY01035099.1 |
